# Supplementary material for: A high energy flexible symmetric supercapacitor fabricated using N-doped activated carbon derived from palm flowers
Source: Royal Society of Chemistry journal article supplement (doi:10.1039/d1na00261a), 2021-01-01
Supplement: d1na00261a1.pdf [file d1na00261a1.pdf]

## High energy flexible symmetric supercapacitor fabricated using N-doped activated carbon derived from palm flower

Malaya K. Sahoo and G. Ranga Rao\*

*Department of Chemistry and DST-Solar Energy Harnessing Centre (DSEHC), Indian Institute of Technology Madras, Chennai 600036, India*

**Table S1** Surface areas of carbons extracted from palm flower residue using KOH solution and calcination at different temperatures.

| Activation conditions of carbon<br>[KOH] / calcination temperature | BET surface area (m <sup>2</sup> g <sup>-1</sup> ) |
|--------------------------------------------------------------------|----------------------------------------------------|
| 2 M / 700 °C                                                       | 786                                                |
| 2 M / 800 °C                                                       | 796                                                |
| 2 M / 900 °C                                                       | 610                                                |
| 1 M / 800 °C                                                       | 625                                                |
| 2 M / 800 °C                                                       | 796                                                |
| 3 M / 800 °C                                                       | 492                                                |

---

\*Corresponding author; Tel.: +91 44 2257 4226; Fax: +91 44 2257 4202; E-mail:

[grrao@iitm.ac.in](mailto:grrao@iitm.ac.in) (G. Ranga Rao).

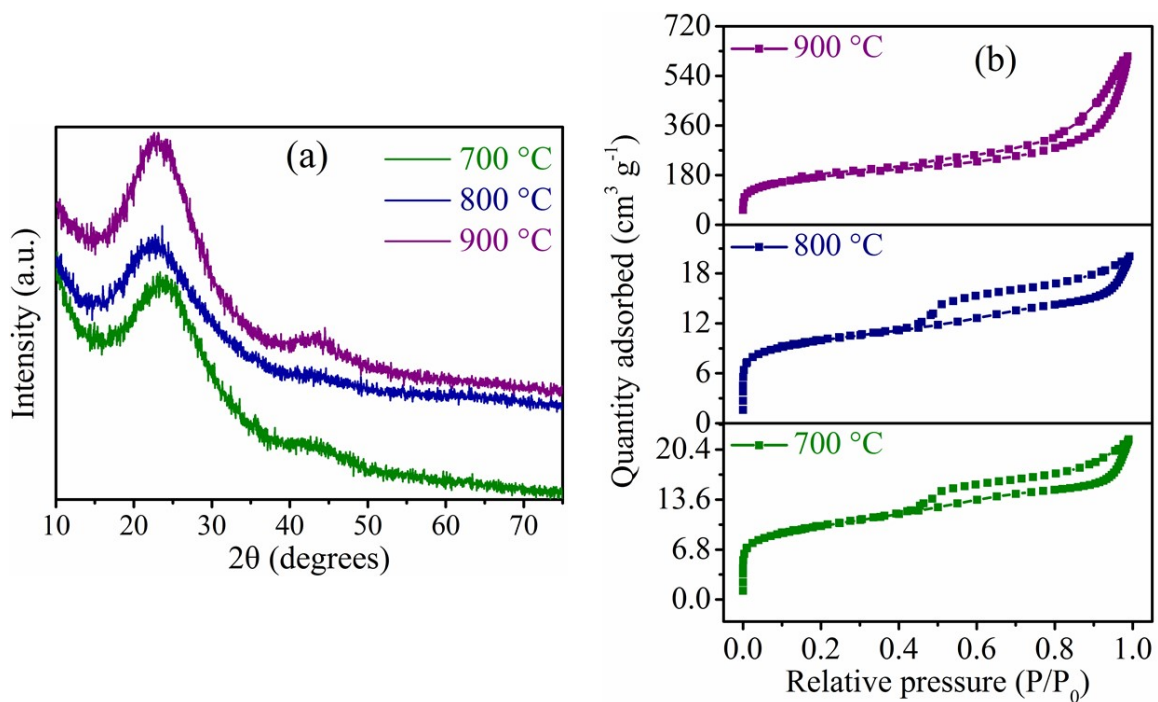

**Fig. S1** (a) PXRD patterns and (b) BET isotherms of activated carbons obtained by activation of palm flower using 2 M KOH under autoclave conditions at 160 °C and calcined at different furnace temperatures in nitrogen flow.

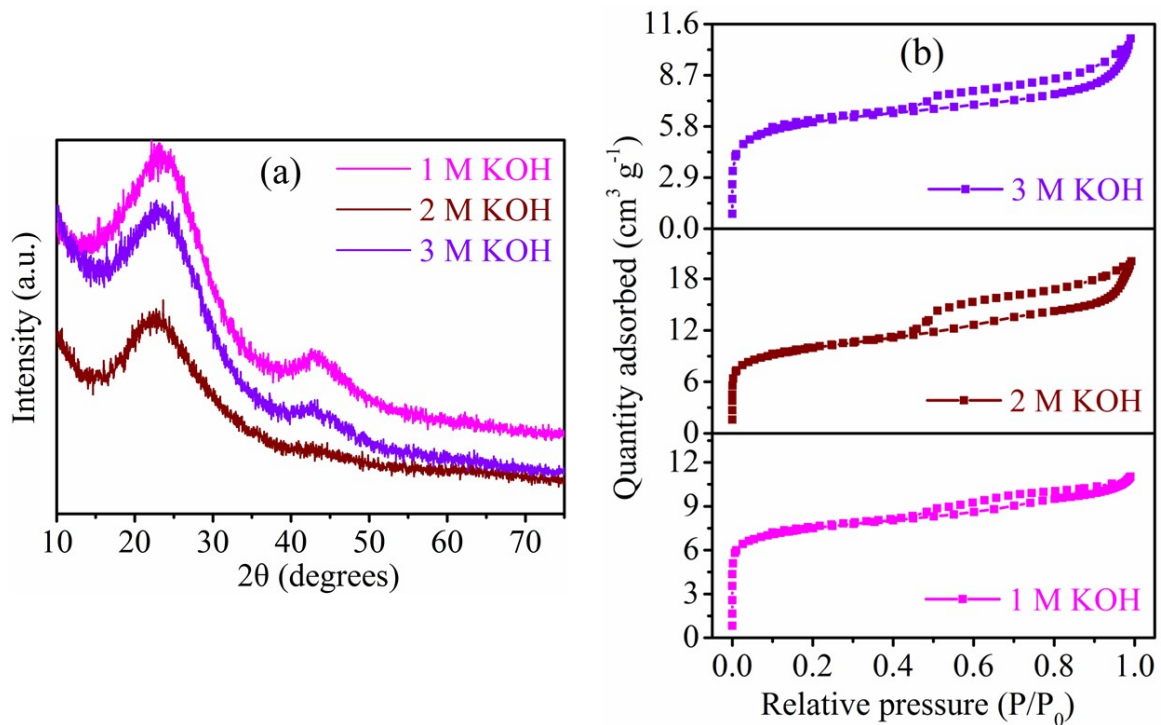

**Fig. S2** (a) PXRD patterns and (b) BET isotherms of activated carbons obtained by activation of palm flower using 1, 2, and 3 M KOH under autoclave conditions at 160 °C and calcined at 800 °C fixed furnace temperature in nitrogen flow.

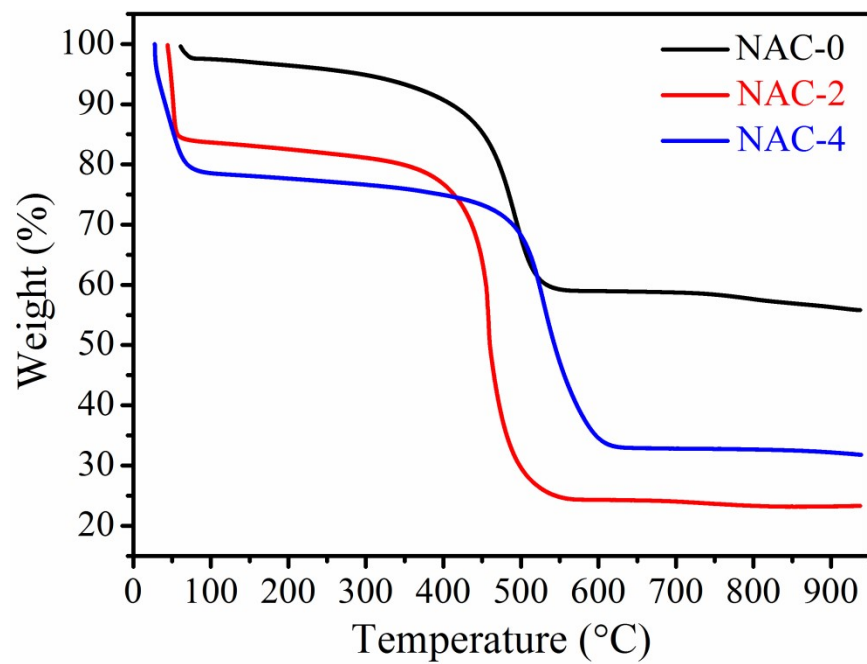

**Fig. S3** TGA curves of nitrogen doped activated carbons recorded in air atmosphere.

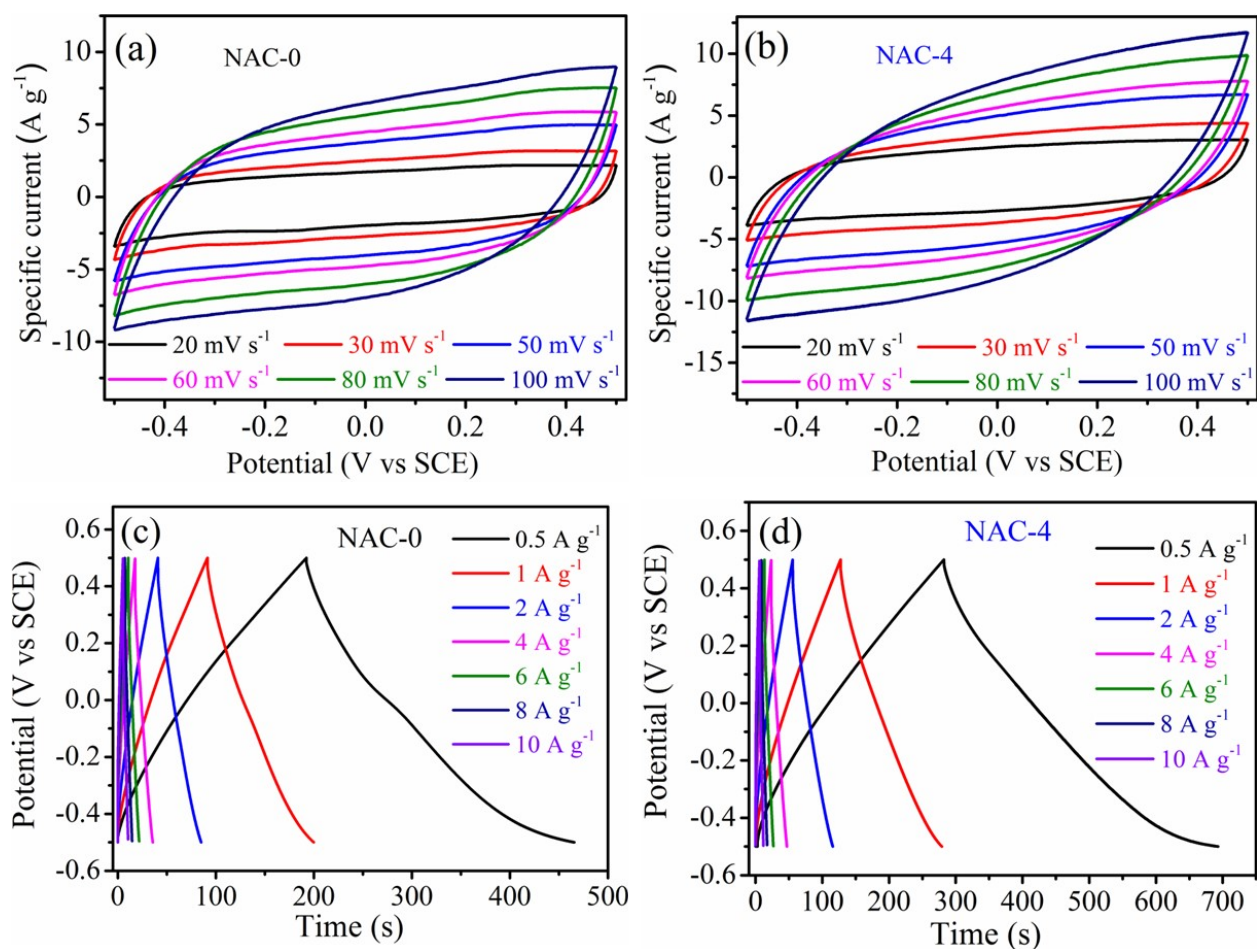

**Fig. S4** CV profiles of (a) NAC-0 and (b) NAC-4 electrodes at different scan rates. GCD profiles of (c) NAC-0 and (d) NAC-4 electrodes at different current densities.

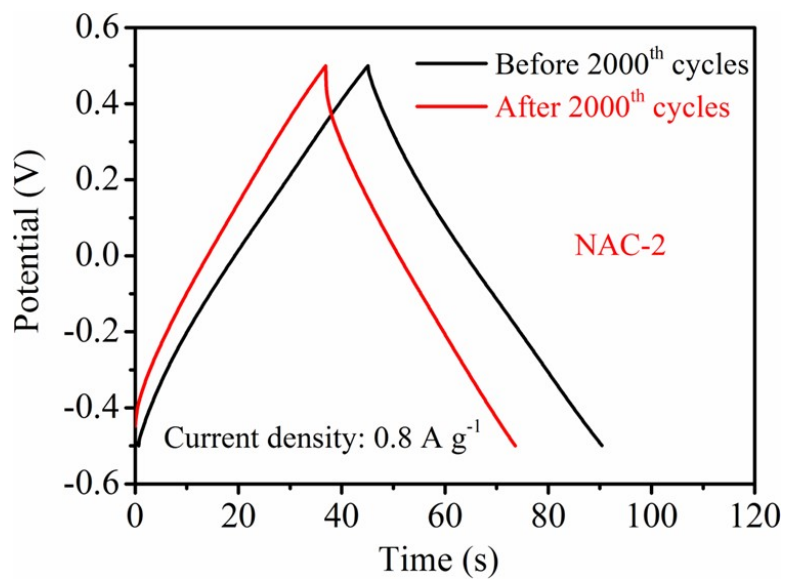

**Fig. S5** Charge-discharge curves of NAC-2 electrode before and after 2000 galvanostatic charge-discharge (GCD) cycles at 0.8 A g<sup>-1</sup>.

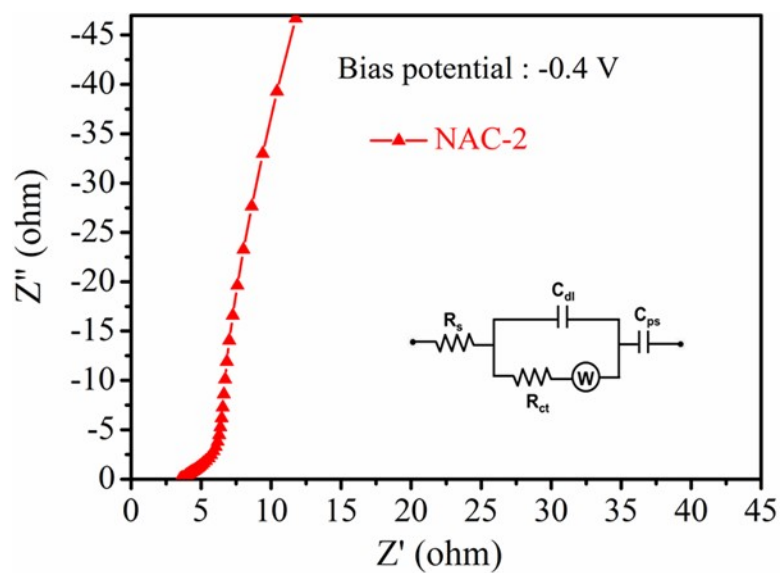

**Fig. S6** Nyquist plot of NAC-2 electrode at -0.4 V and inset shows the equivalent circuit fit.

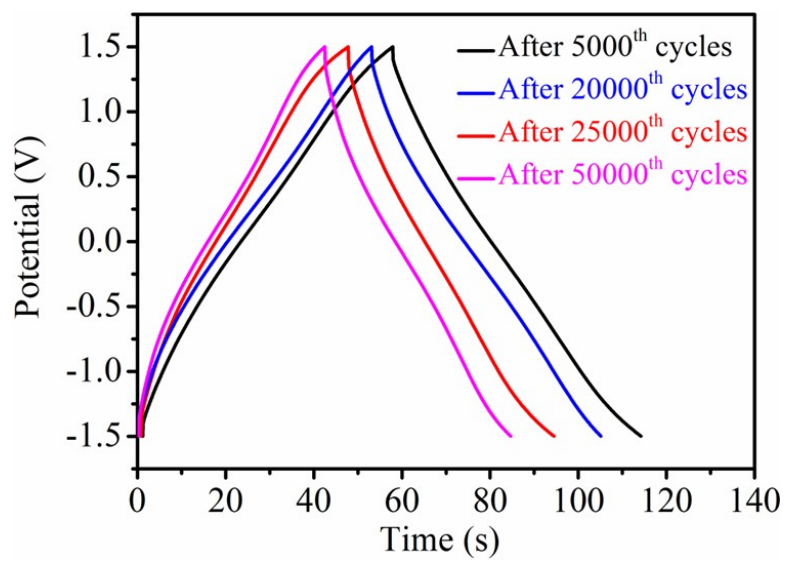

**Fig. S7** Charge-discharge curves of the fabricated symmetric device at different intervals of cyclic tests.



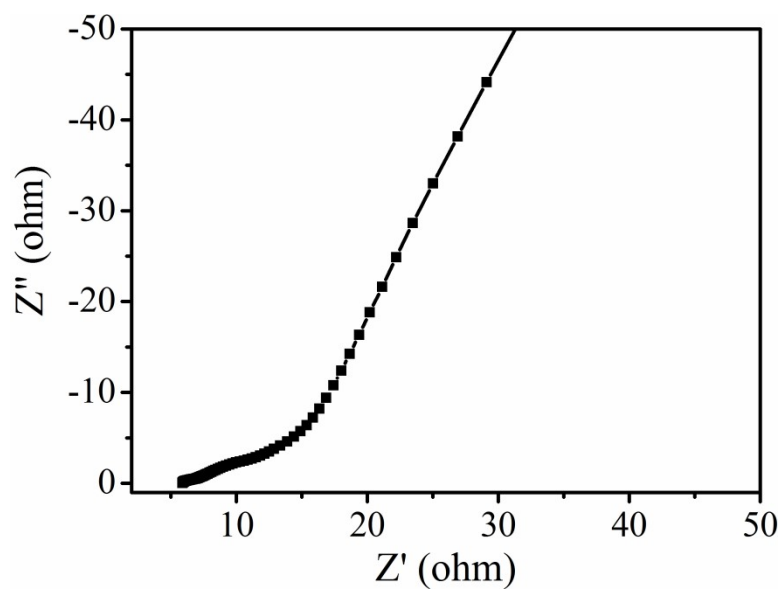

**Fig. S8** Nyquist plot of NAC-2 electrode at -0.4 V in 0.1 M  $\text{H}_2\text{SO}_4/\text{PVA}$  solid electrolyte.
